# Supplementary material
Source: publisher figshare collection journal article supplement (https://acs.figshare.com/ndownloader/files/8213840)

## Supporting Information

# Addressing Structural Flexibility at the A-Ring on Salvinorin A: Discovery of a Potent Kappa Opioid Agonist with Enhanced Metabolic Stability

*Alexander M. Sherwood,<sup>1†</sup> Rachel Saylor Crowley,<sup>1†</sup> Kelly F. Paton,<sup>2</sup> Andrew  
Biggerstaff,<sup>2</sup> Benjamin Neuenswander,<sup>1</sup> Victor W. Day,<sup>3</sup> Bronwyn M. Kivell,<sup>2</sup> and Thomas  
E. Prisinzano<sup>1\*</sup>*

<sup>1</sup> Department of Medicinal Chemistry, School of Pharmacy, The University of Kansas,  
Lawrence, KS, USA. <sup>2</sup> School of Biological Sciences, Centre for Biodiscovery, Victoria  
University of Wellington, New Zealand. <sup>3</sup> Department of Chemistry, The University of  
Kansas, Lawrence, KS, USA. <sup>†</sup>These authors contributed equally to this work.

\*To whom correspondence should be addressed. Thomas E. Prisinzano, Professor and  
Chair, 1251 Wescoe Hall Drive, 4070 Malott Hall, Lawrence, Kansas 66045-7572.  
Telephone: (785) 864-3267. Fax: (785) 864-5326.

### Supporting Information Table of Contents:

|                                            |                |
|--------------------------------------------|----------------|
| Supplementary Figures, Schemes, and Tables | <b>S2-S5</b>   |
| NMR spectra for All Novel Compounds        | <b>S6-S12</b>  |
| HPLC Traces for All Novel Compounds        | <b>S13-S20</b> |

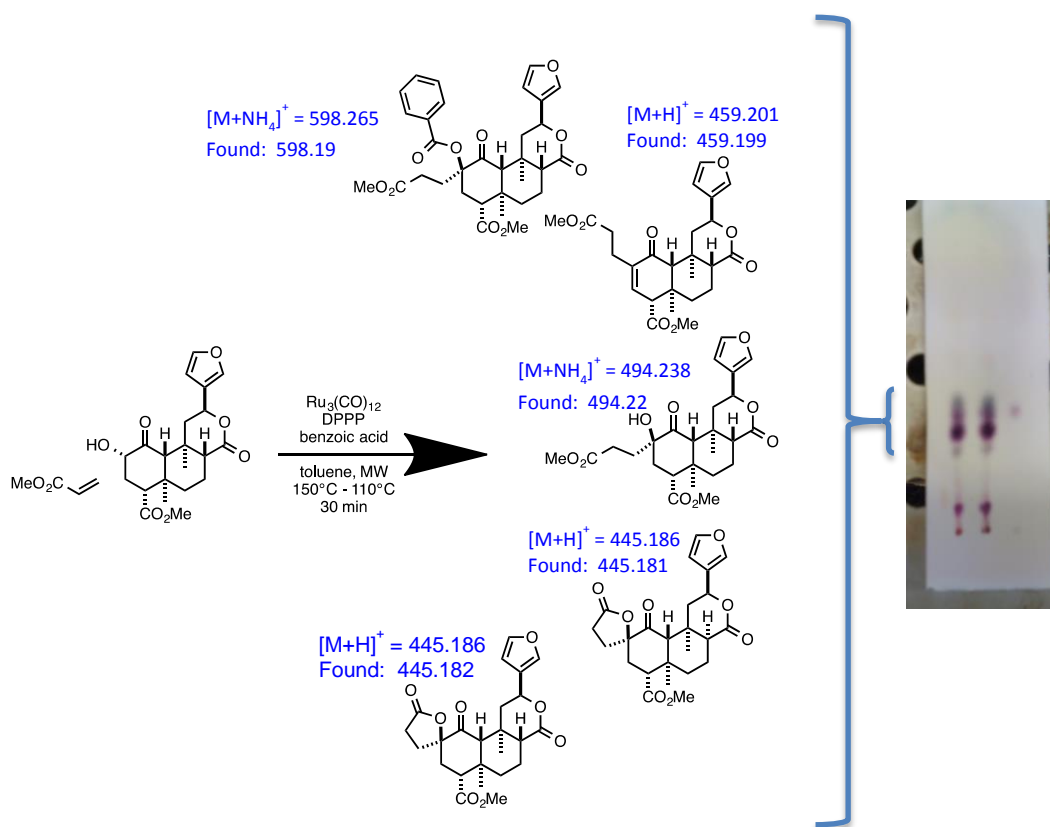

**Figure S1.** Thin layer chromatography analysis of crude reaction mixture (30 % EtOAc in hexanes; vanillin stain). Proposed structures identified by mass are shown.

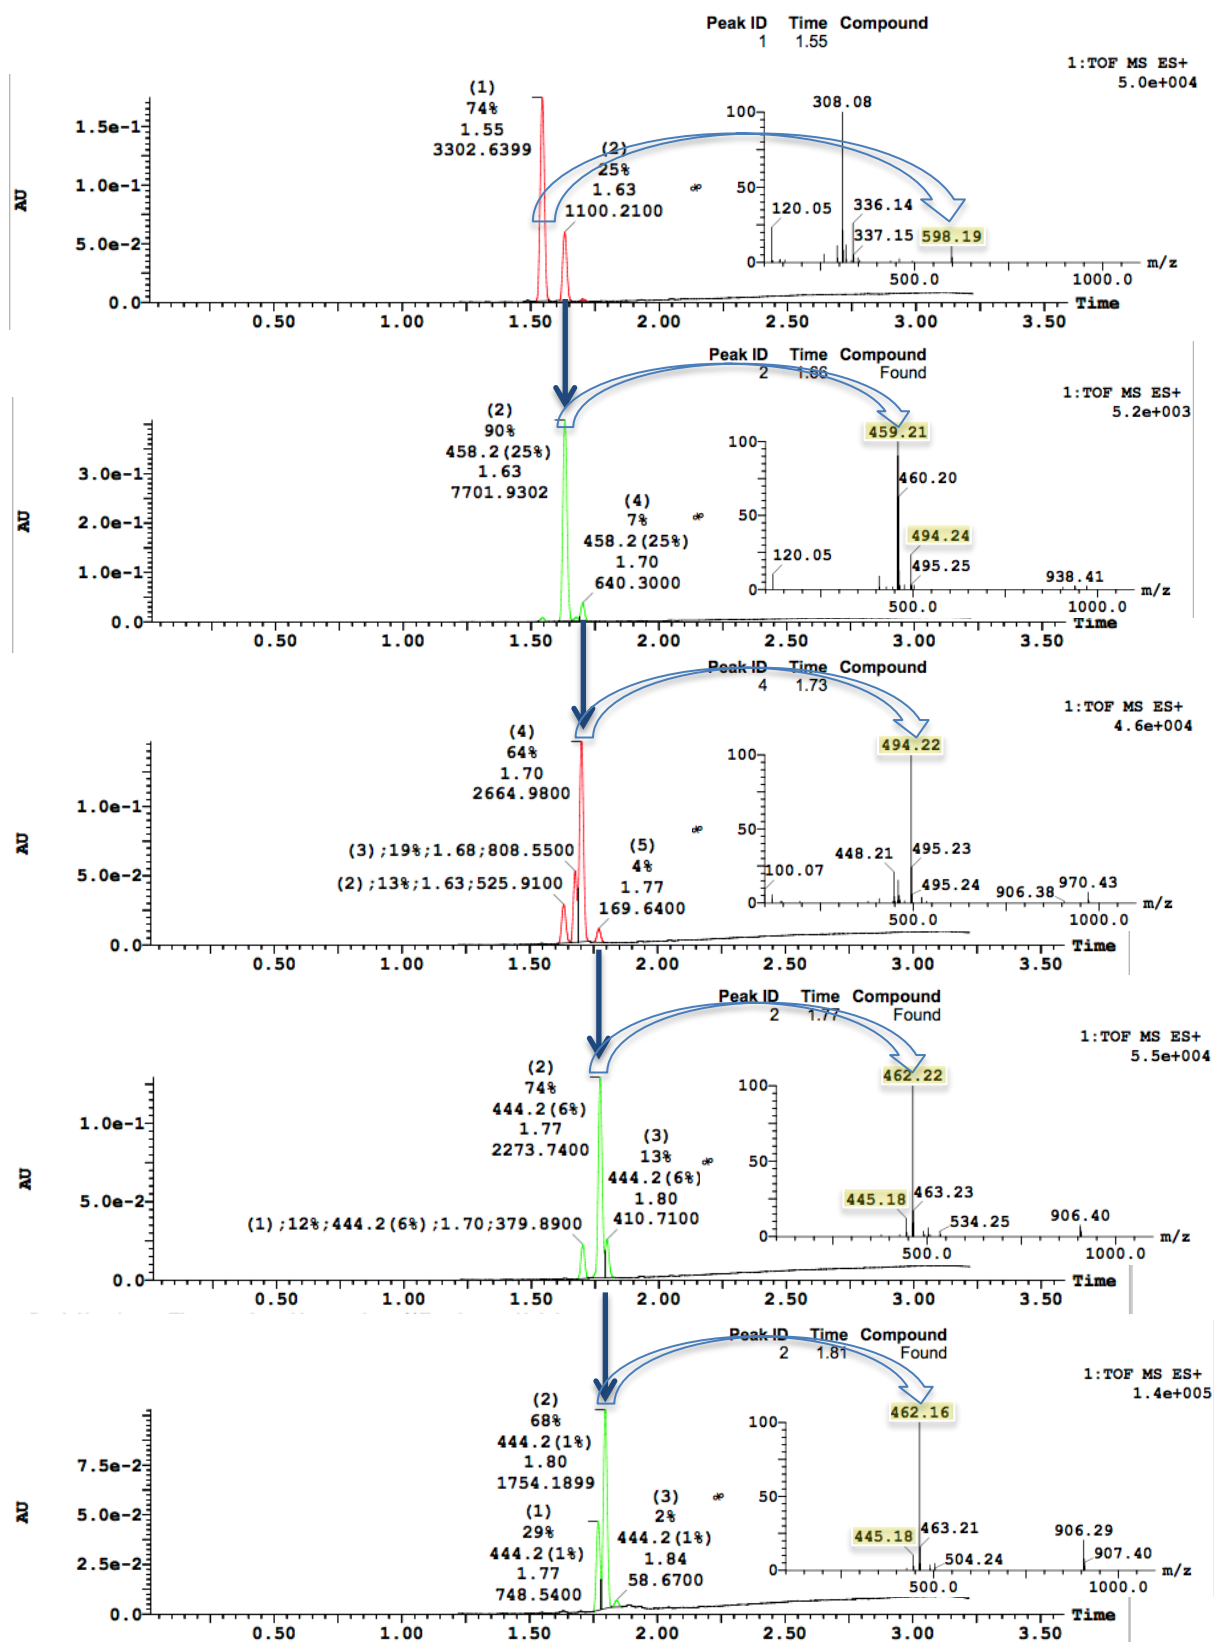

**Figure S2.** HPLC analysis for fractionated proposed structures (~70 % single compound) aligned by retention time. Mass spectrum for major component shown on right with mass highlighted in yellow.

| Proposed structure                                                                  | RT (min) | % mass recovery | % enriched | Adduct                                                  | Calcd.               | Found                | kOR activity Potency $\pm$ SEM <sup>a,b</sup> (nM) |
|-------------------------------------------------------------------------------------|----------|-----------------|------------|---------------------------------------------------------|----------------------|----------------------|----------------------------------------------------|
| 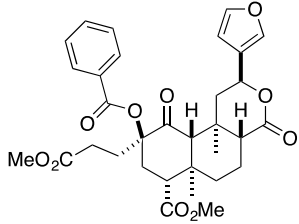   | 1.55     | 2.4             | 74         | [M+NH <sub>4</sub> ] <sup>+</sup>                       | 598.2647             | 598.1988             | 160 $\pm$ 20                                       |
|    | 1.63     | 24.5            | 90         | [M+H] <sup>+</sup>                                      | 459.2013<br>494.2385 | 459.1987             | >1000 <sup>c</sup>                                 |
|   | 1.70     | 4.5             | 64         | [M+NH <sub>4</sub> ] <sup>+</sup>                       | 494.2385             | 494.2284             | 100 $\pm$ 40                                       |
|  | 1.77     | 11.6            | 74         | [M+NH <sub>4</sub> ] <sup>+</sup><br>[M+H] <sup>+</sup> | 462.2122<br>445.1857 | 462.2286<br>445.1813 | 0.6 $\pm$ 0.2                                      |
|  | 1.80     | 2.3             | 68         | [M+NH <sub>4</sub> ] <sup>+</sup><br>[M+H] <sup>+</sup> | 462.2122<br>445.1857 | 462.2287<br>445.1816 | 22 $\pm$ 7                                         |

<sup>a</sup>Mean  $\pm$  standard error of the mean; n  $\geq$  2 individual experiments run in triplicate. <sup>b</sup>KOR E<sub>max</sub> = 100%. <sup>c</sup>KOR E<sub>max</sub> = 0% up to 10uM

**Table S1.** Proposed structures from Figures S1 and S2 organized by retention time with mass characterization shown and corresponding activity at KOR.

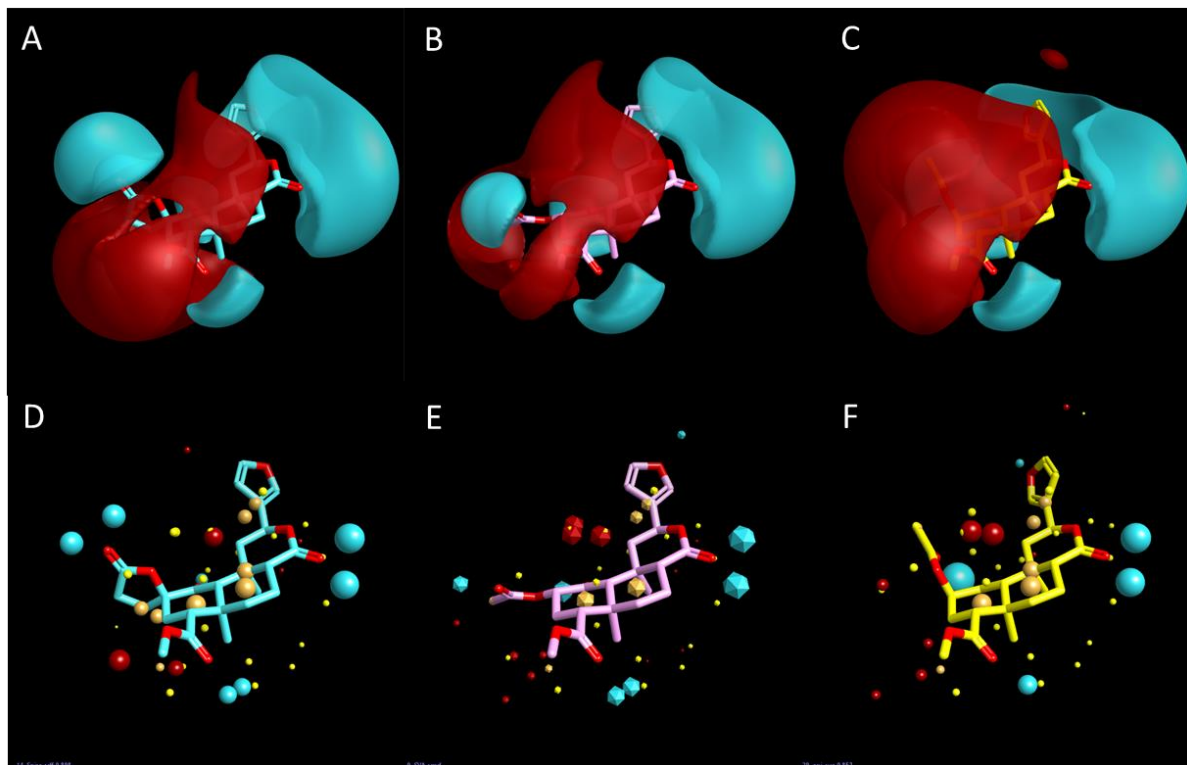

**Figure S3.** A-C) Surface view. Blue and red indicate negative and positive electrostatic surfaces, respectively. D-E) Field points of compounds. The size of the points indicates relative strength of interaction. Blue and red field points indicate negative and positive electrostatic potential, respectively. Gold and yellow points indicate regions favoring hydrophobic and van der Waals interactions, respectively. A & D) compound **14**, spirobutyrolactone; B & E) compound **9**, salvinorin A; C & F) compound **29**, 2-epi-salvinorin A.

$^1\text{H}$  and  $^{13}\text{C}$  NMR spectra of compound **14**

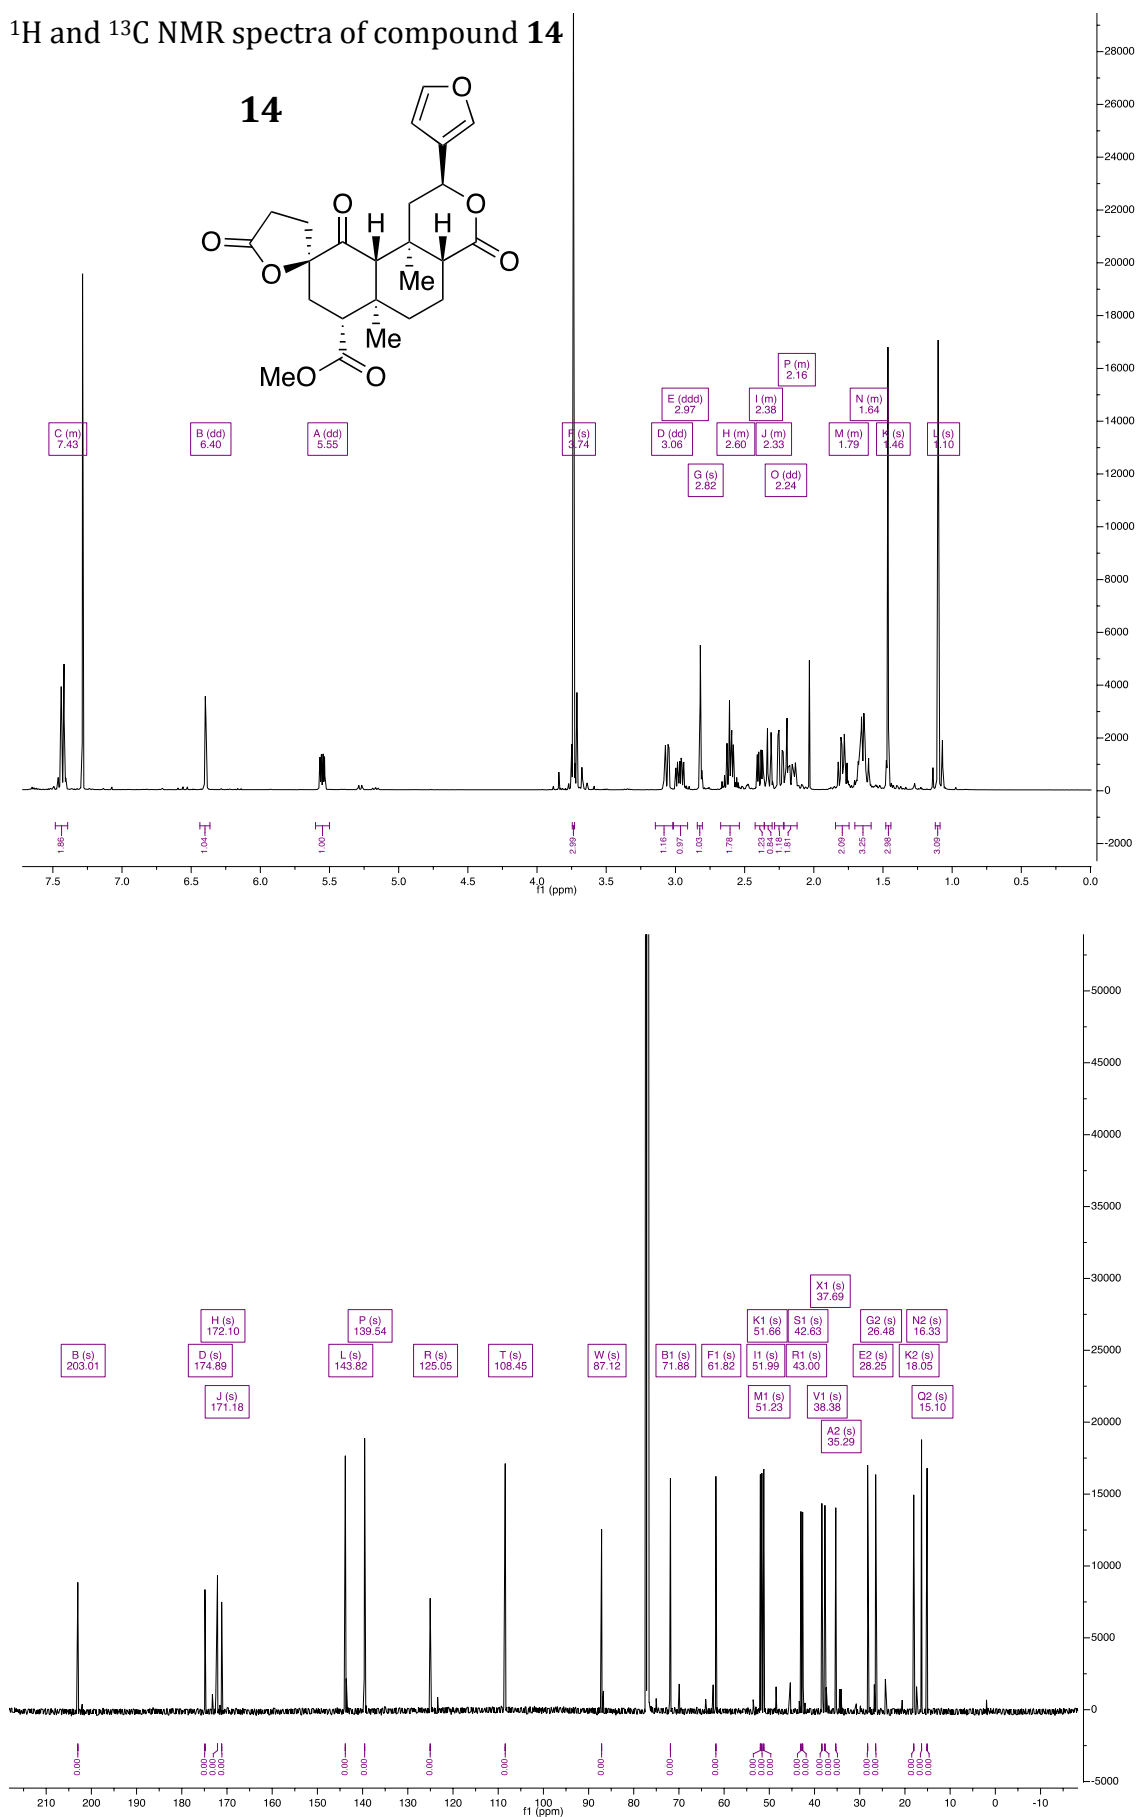

$^1\text{H}$  and  $^{13}\text{C}$  NMR spectra of compound **20**

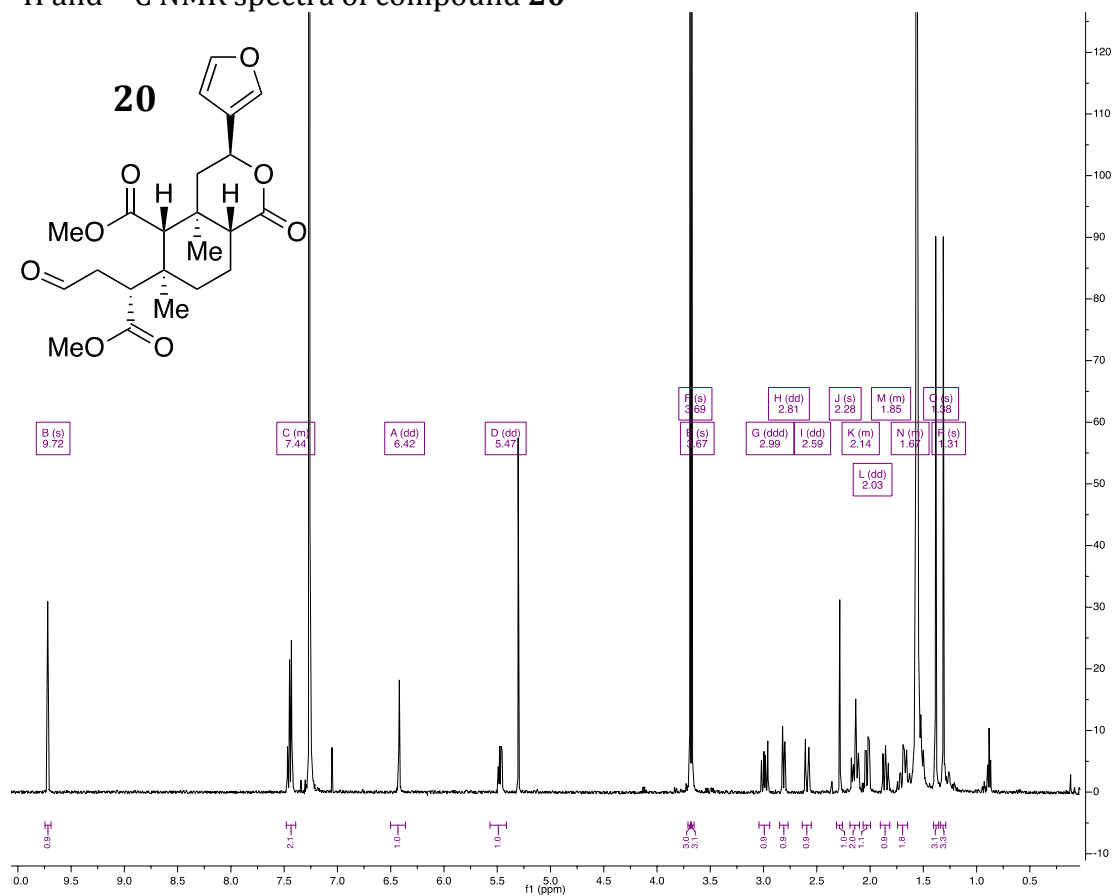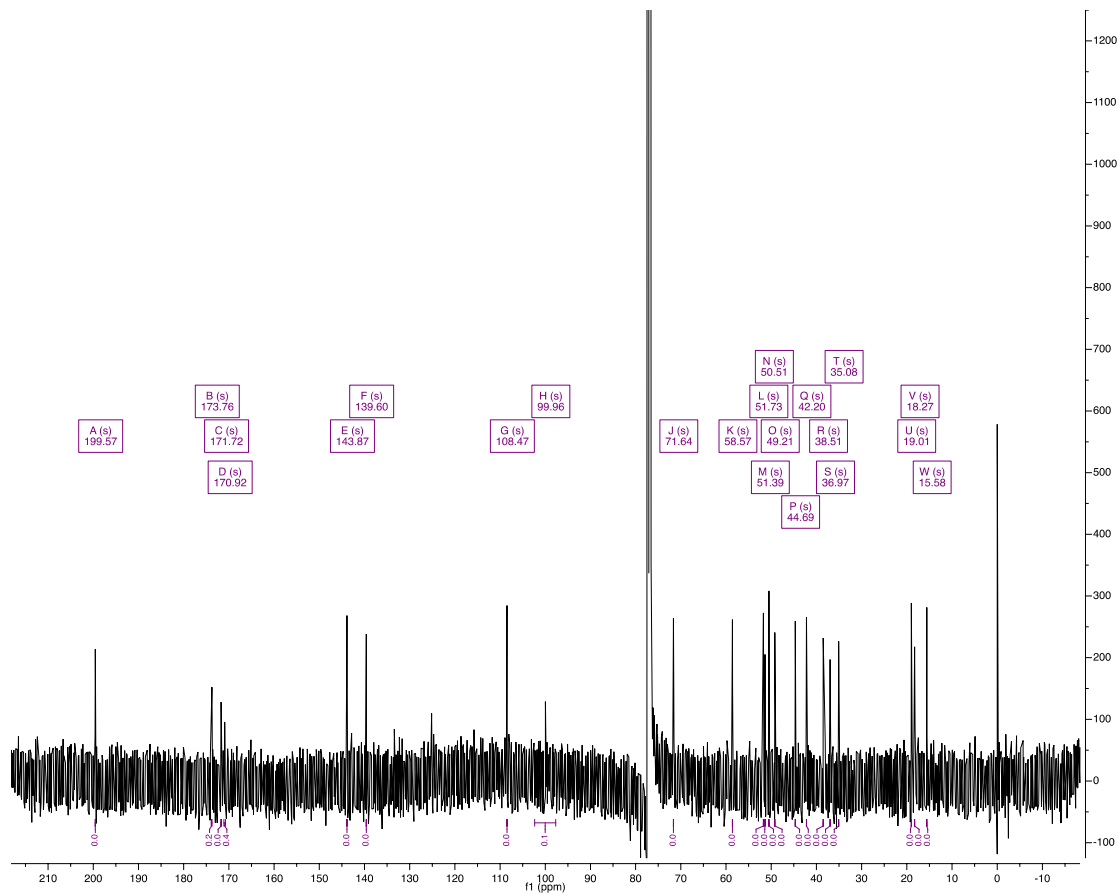

$^1\text{H}$  and  $^{13}\text{C}$  NMR spectra of compound **21**

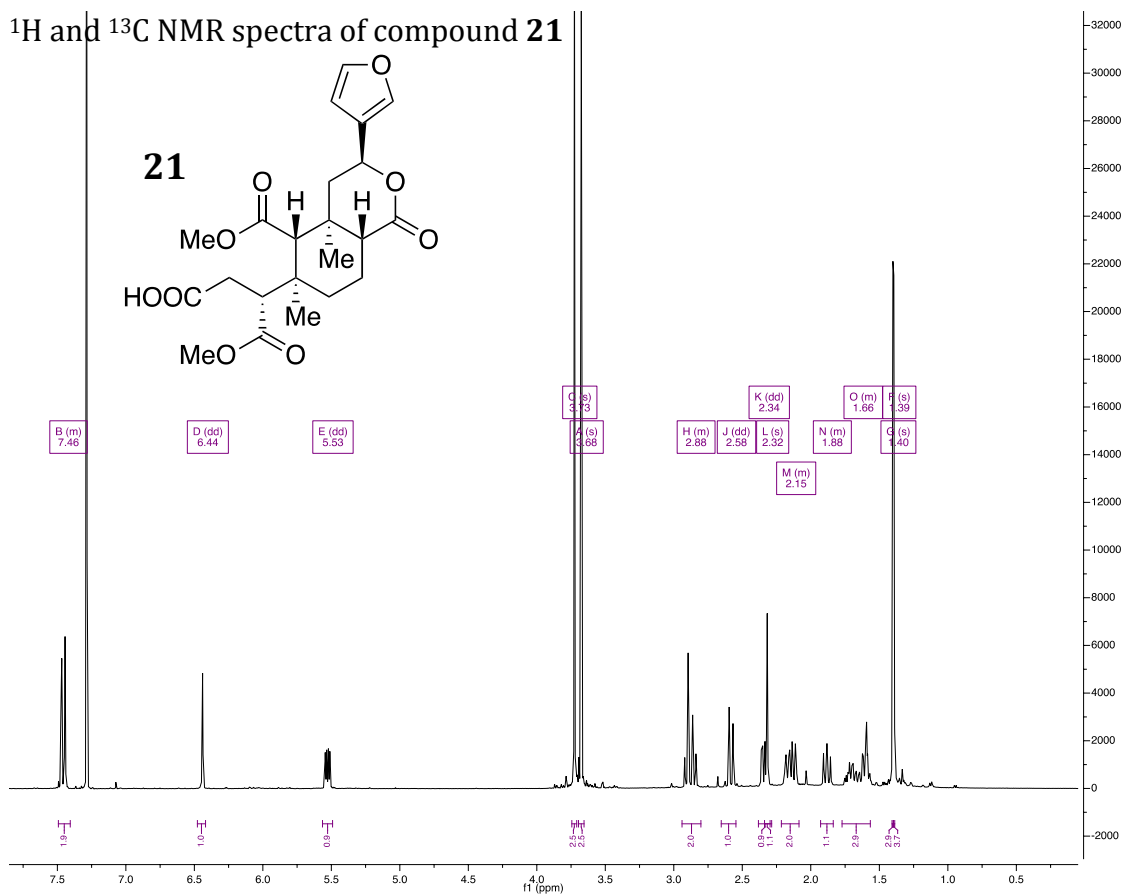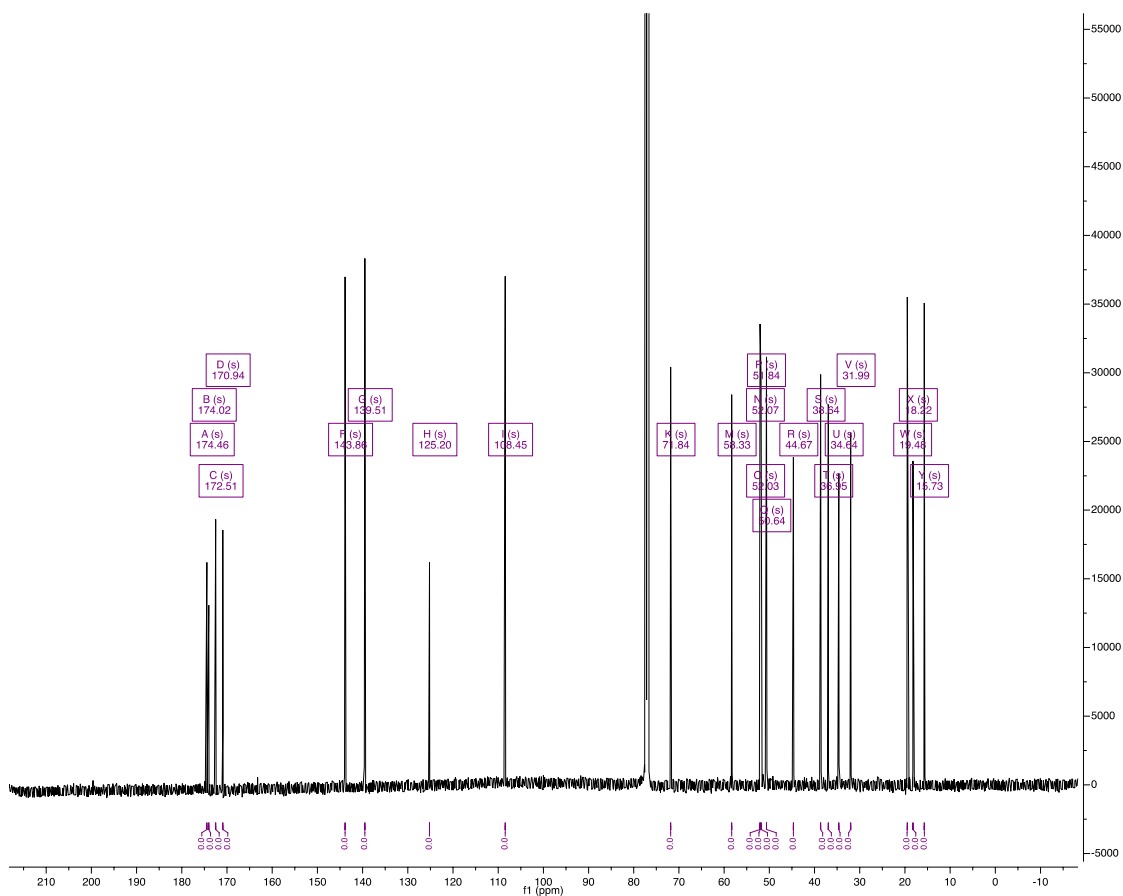



# $^1\text{H}$ and $^{13}\text{C}$ NMR spectra of compound **22**

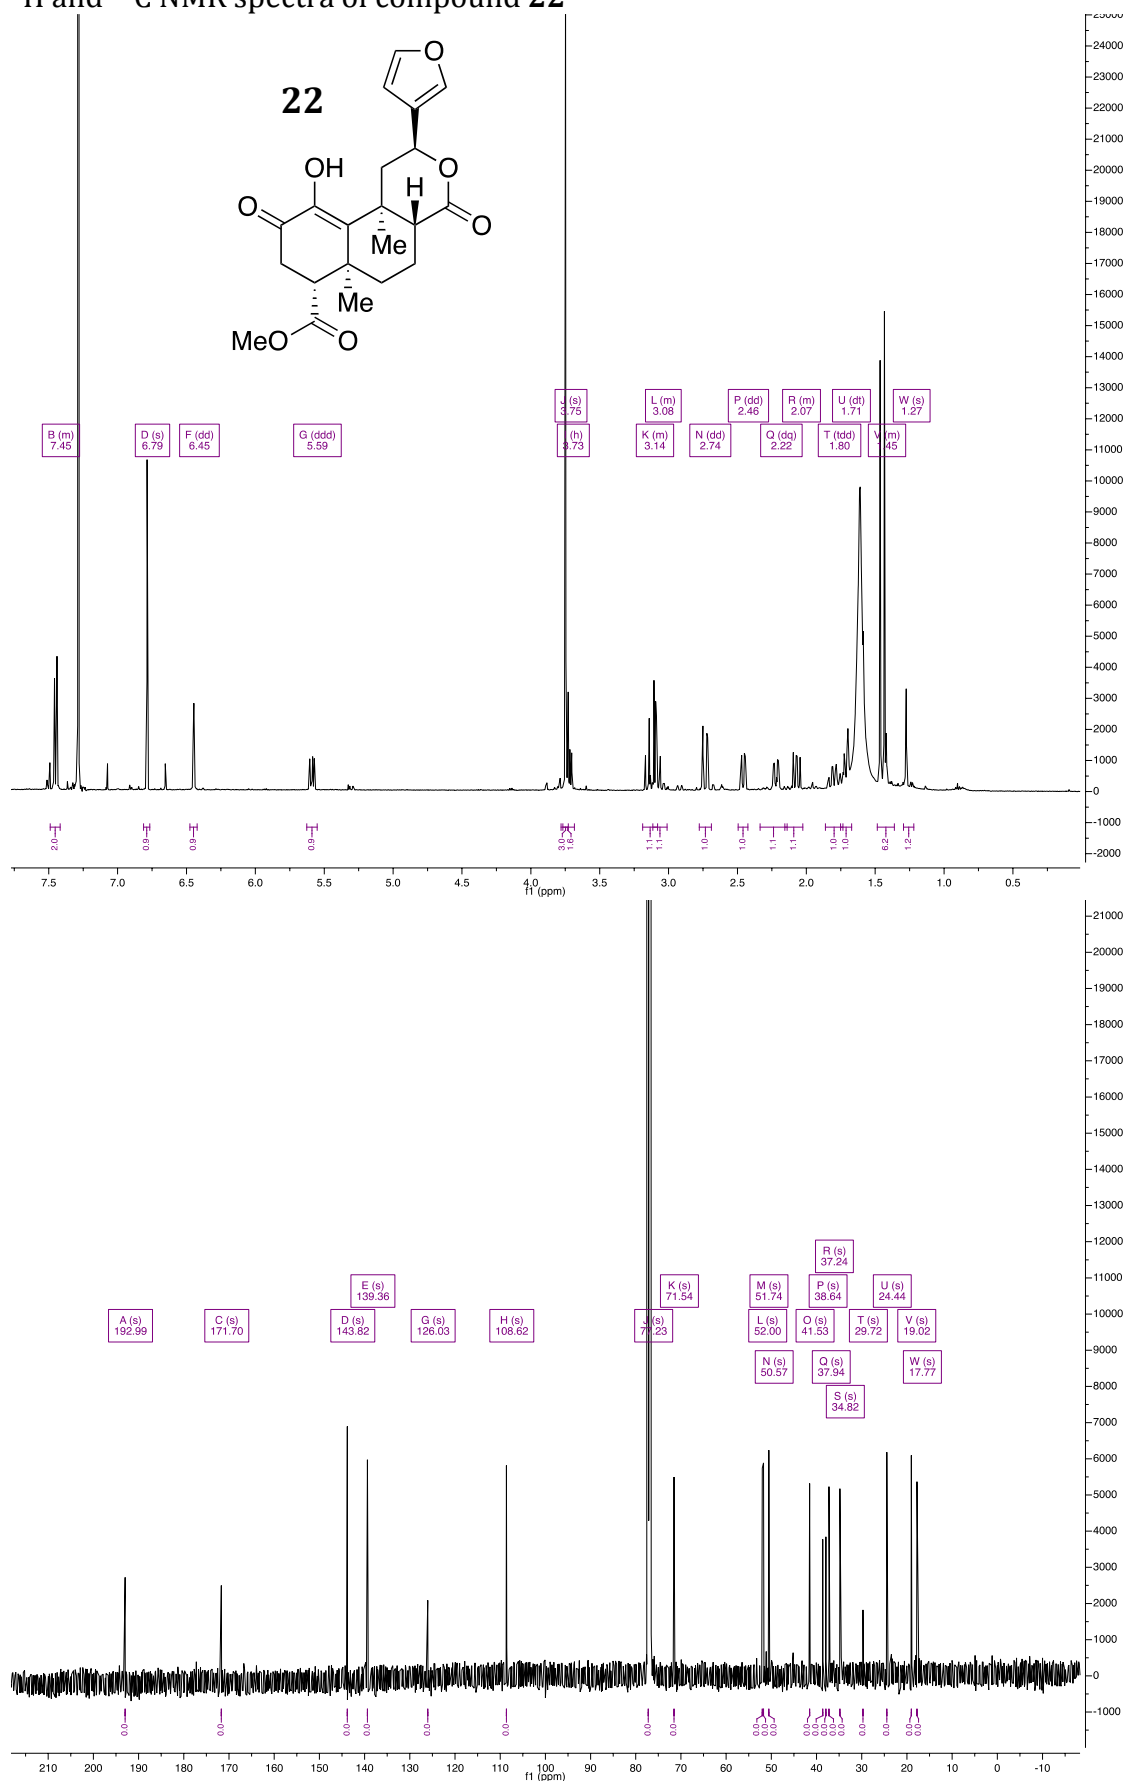

$^1\text{H}$  and  $^{13}\text{C}$  NMR spectra of compound **23**

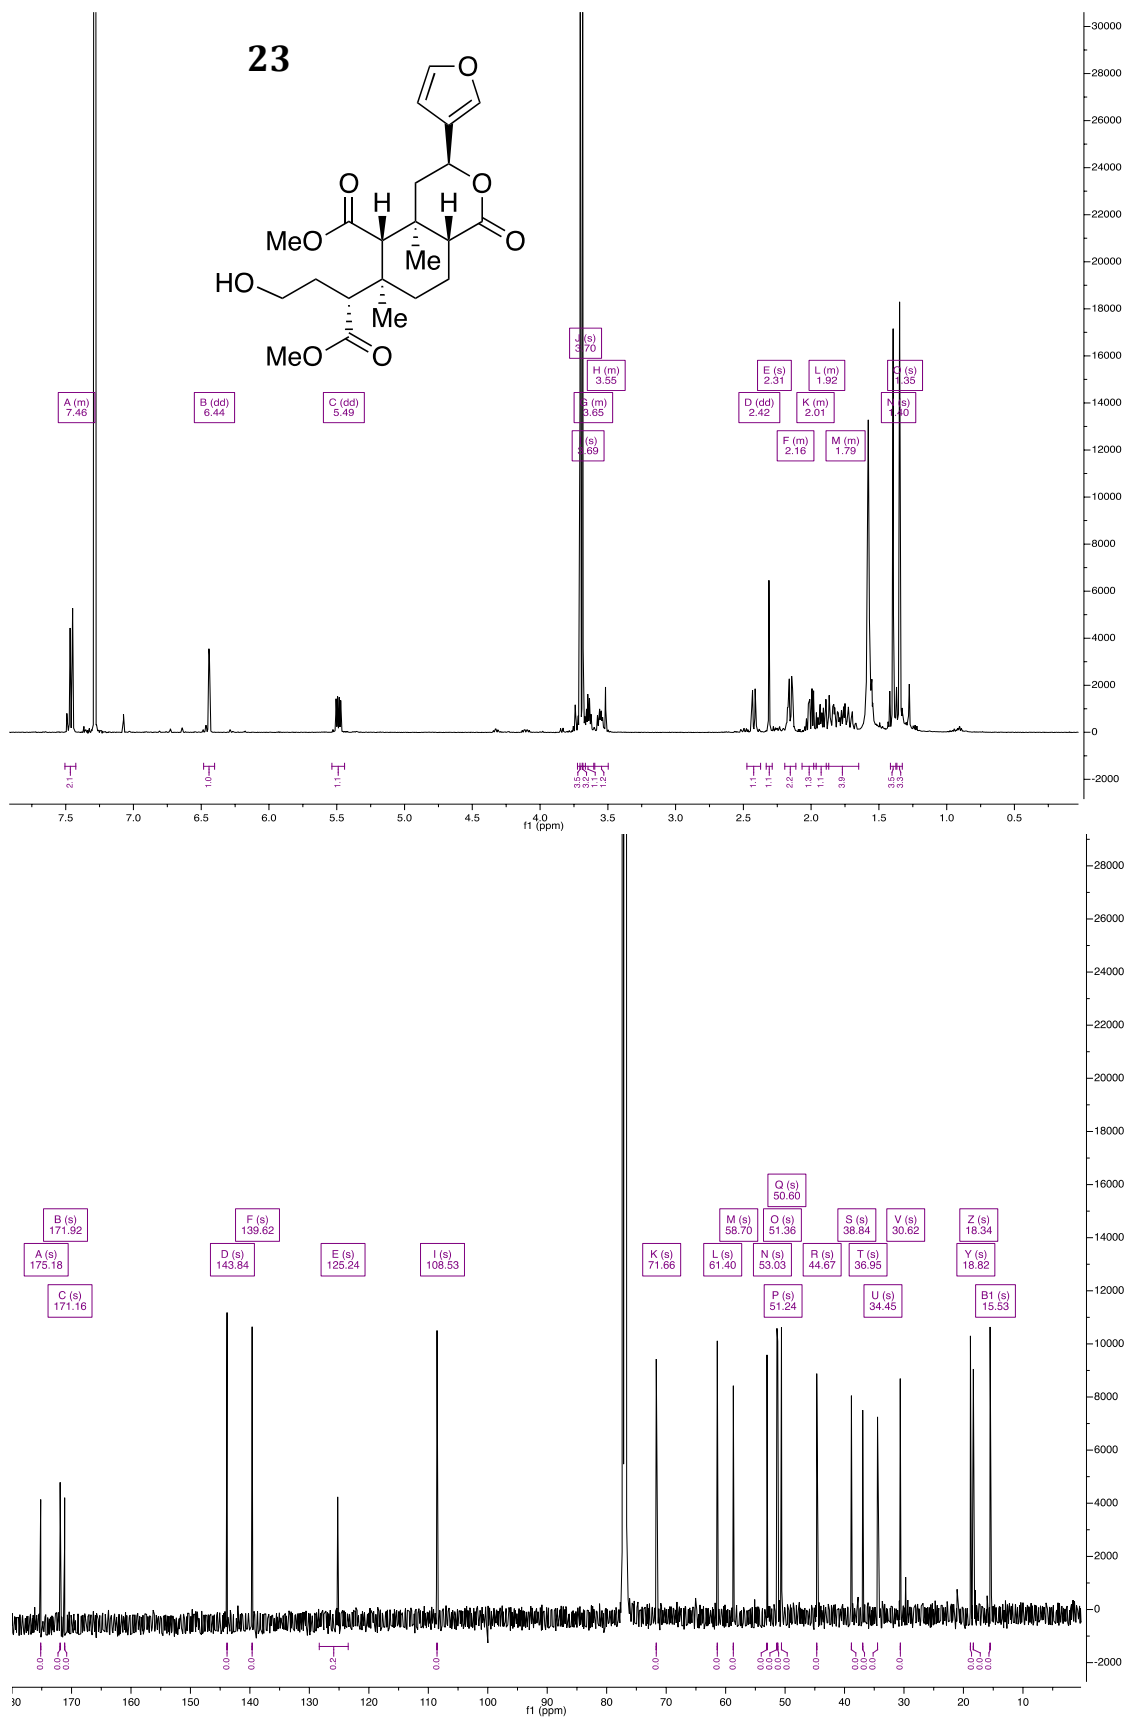

$^1\text{H}$  and  $^{13}\text{C}$  NMR spectra of compound **24**

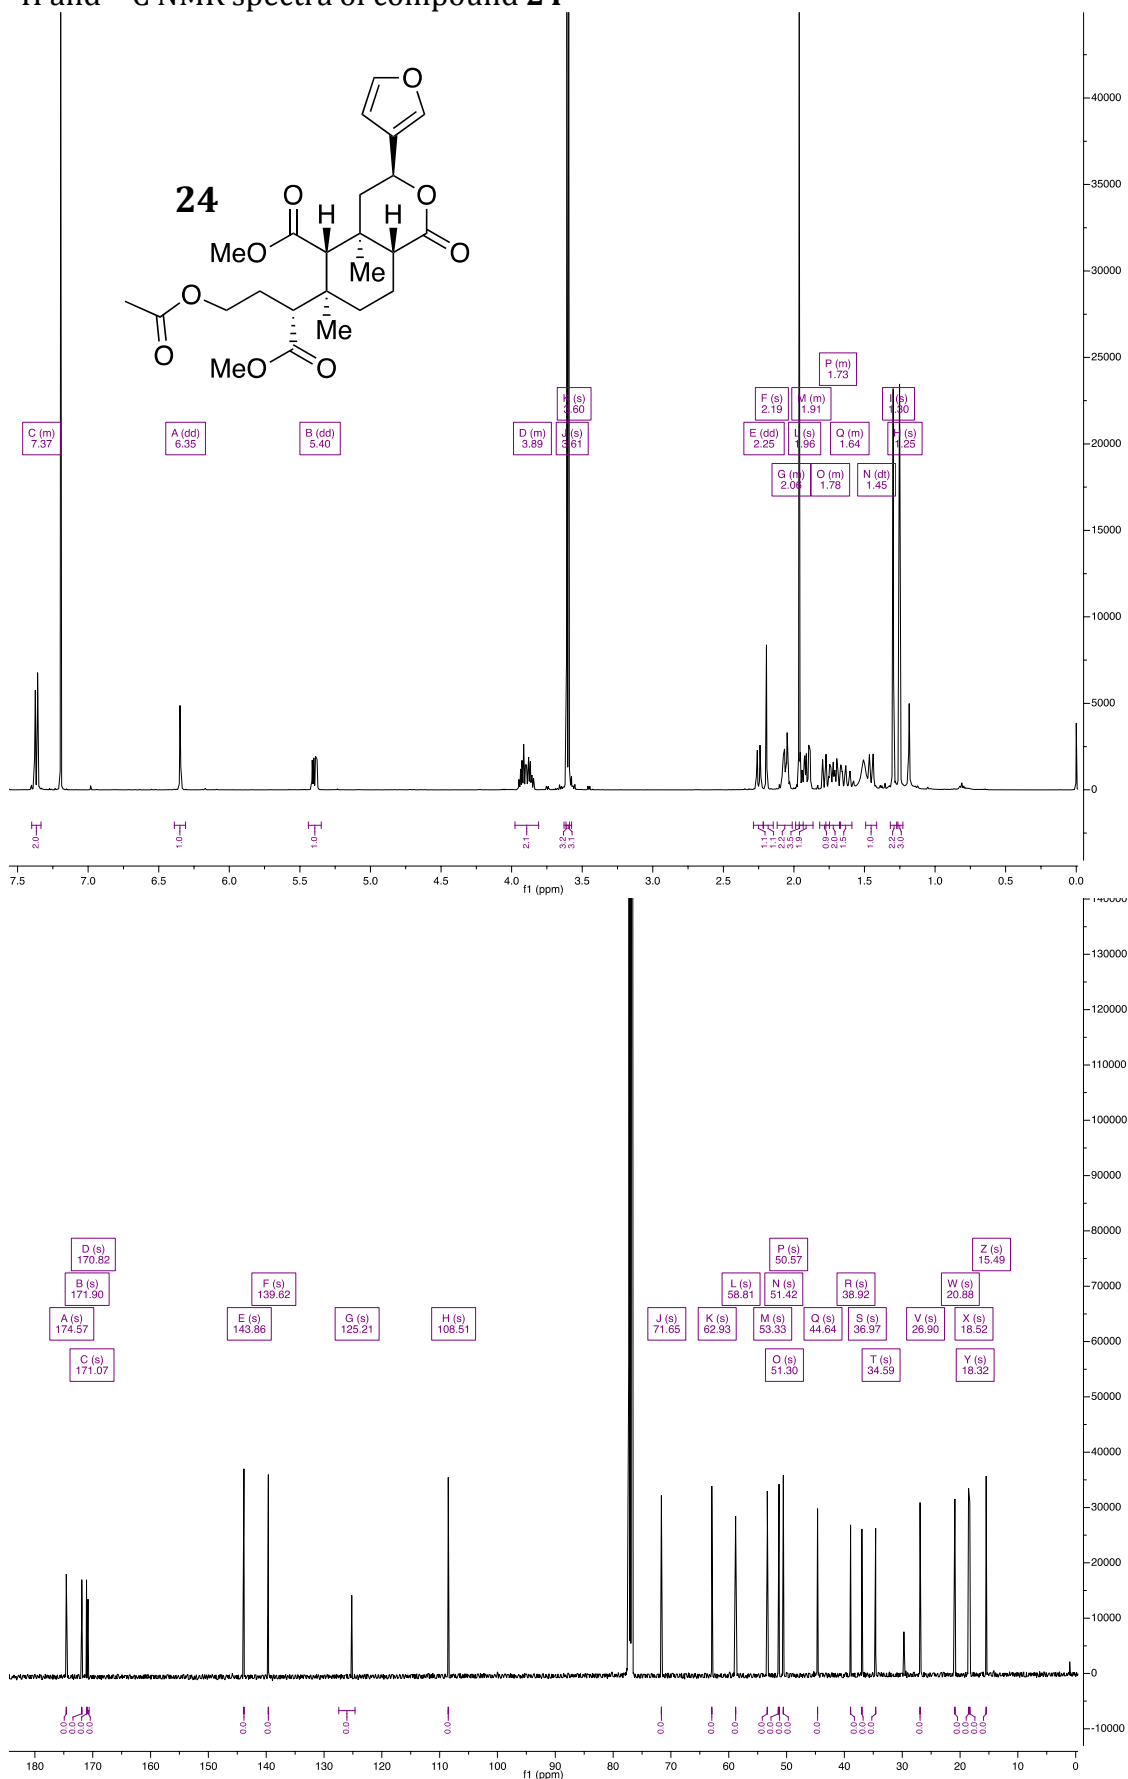

# <sup>1</sup>H and <sup>13</sup>C NMR spectra of compound **25**

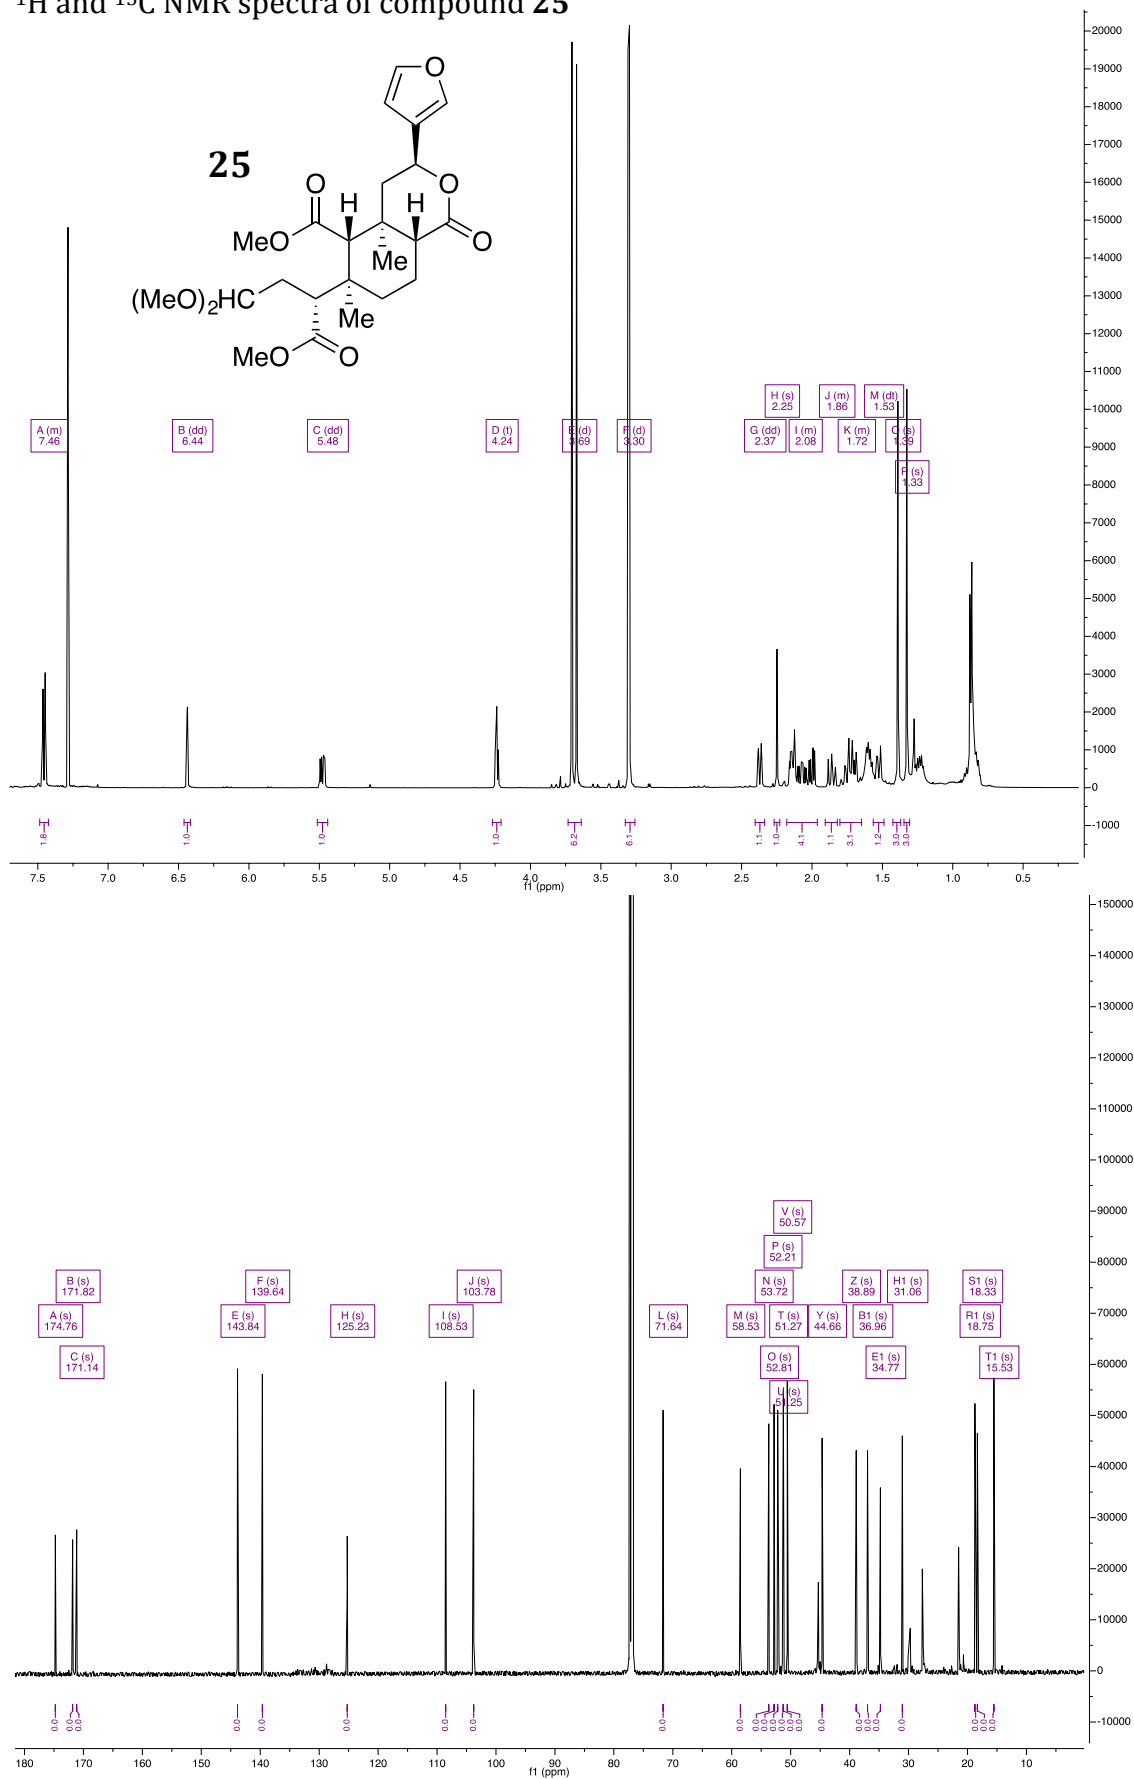

## Chromatogram and purity assessment for compound **14**

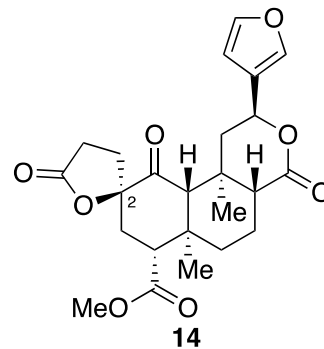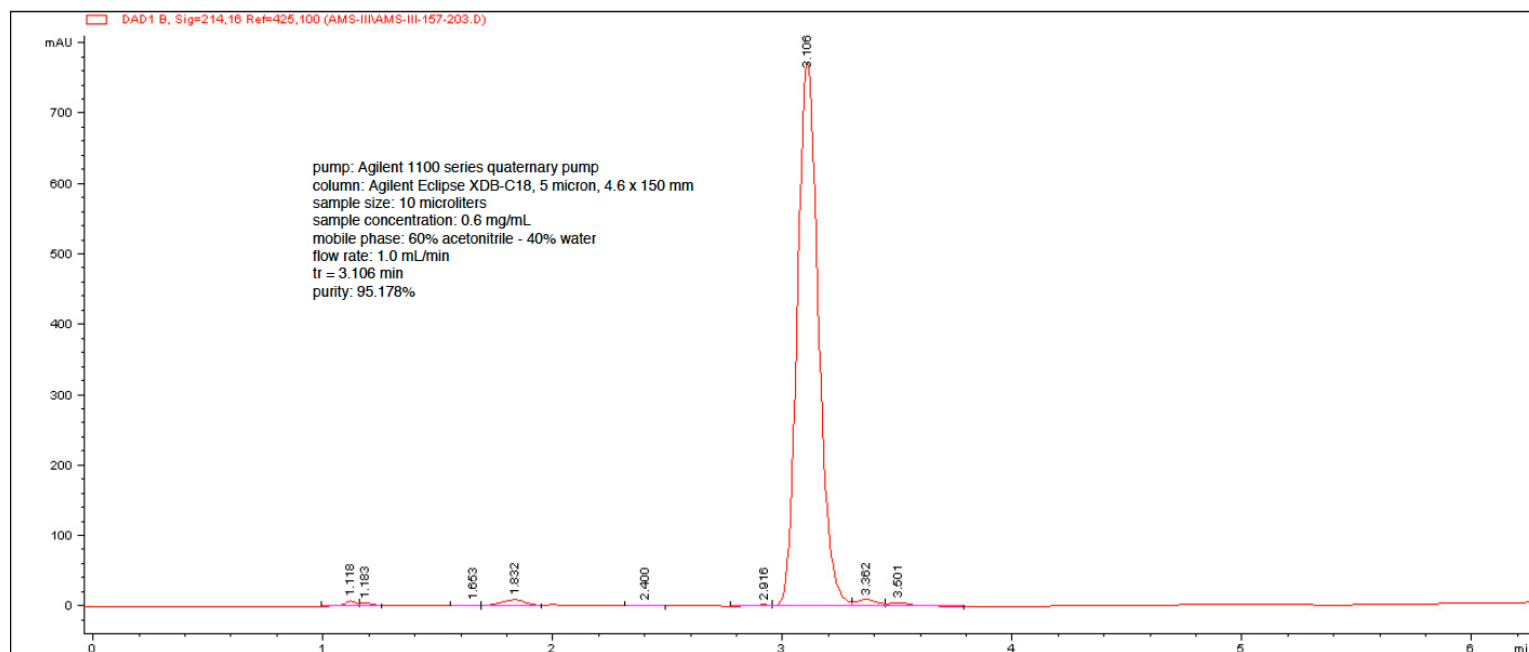

## Chromatogram and purity assessment for compound **20**

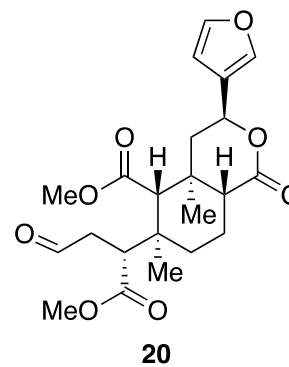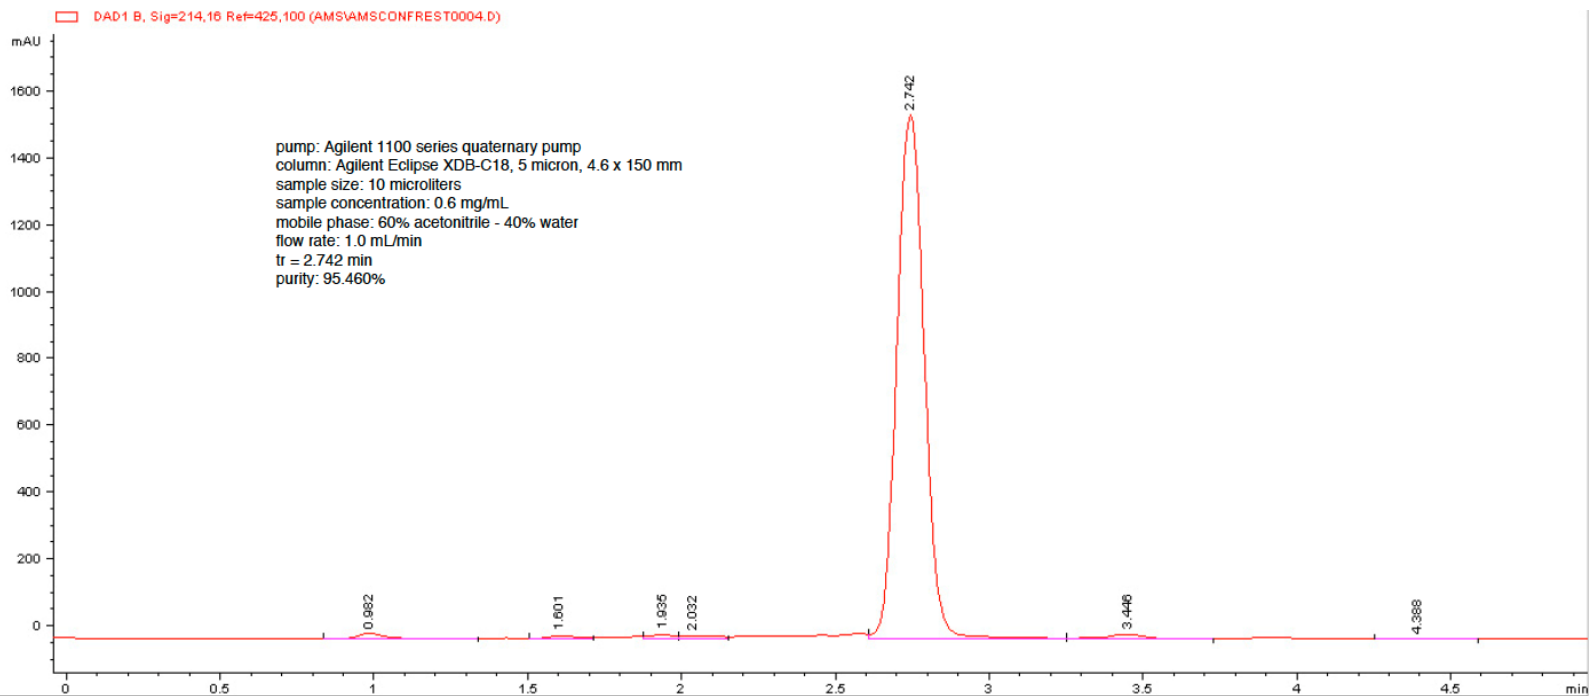

# Chromatogram and purity assessment for compound **21**

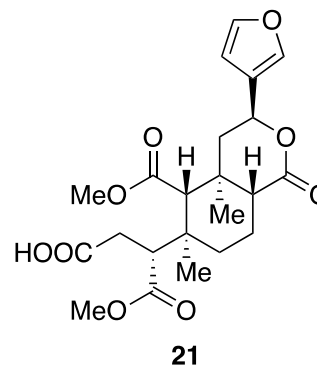

ID AMS-III-125PbOAc4COOHprp File AS160608WT003 Date 08-Jun-2016 Time 16:53:17 Description MDF088283

3: UV Detector: 214

3.364e-1  
Range: 3.364e-1

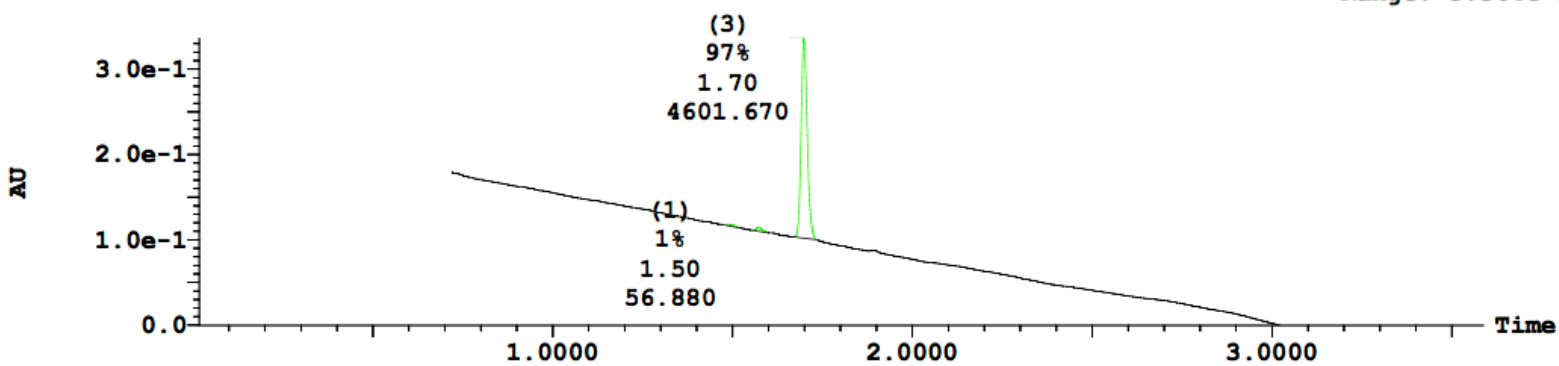

| Peak Number | Time | AreaAbs | Area %Total | Height |
|-------------|------|---------|-------------|--------|
| 1           | 1.50 | 57      | 1.20        | 2241   |
| 2           | 1.57 | 93      | 1.96        | 4731   |
| 3           | 1.70 | 4602    | 96.84       | 234708 |

1: TOF MS ES+ :437.181 Smooth (SG, 2x3)

3.7e+004

# Chromatogram and purity assessment for compound **22**

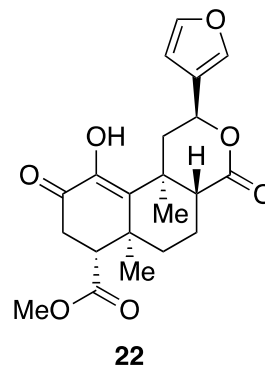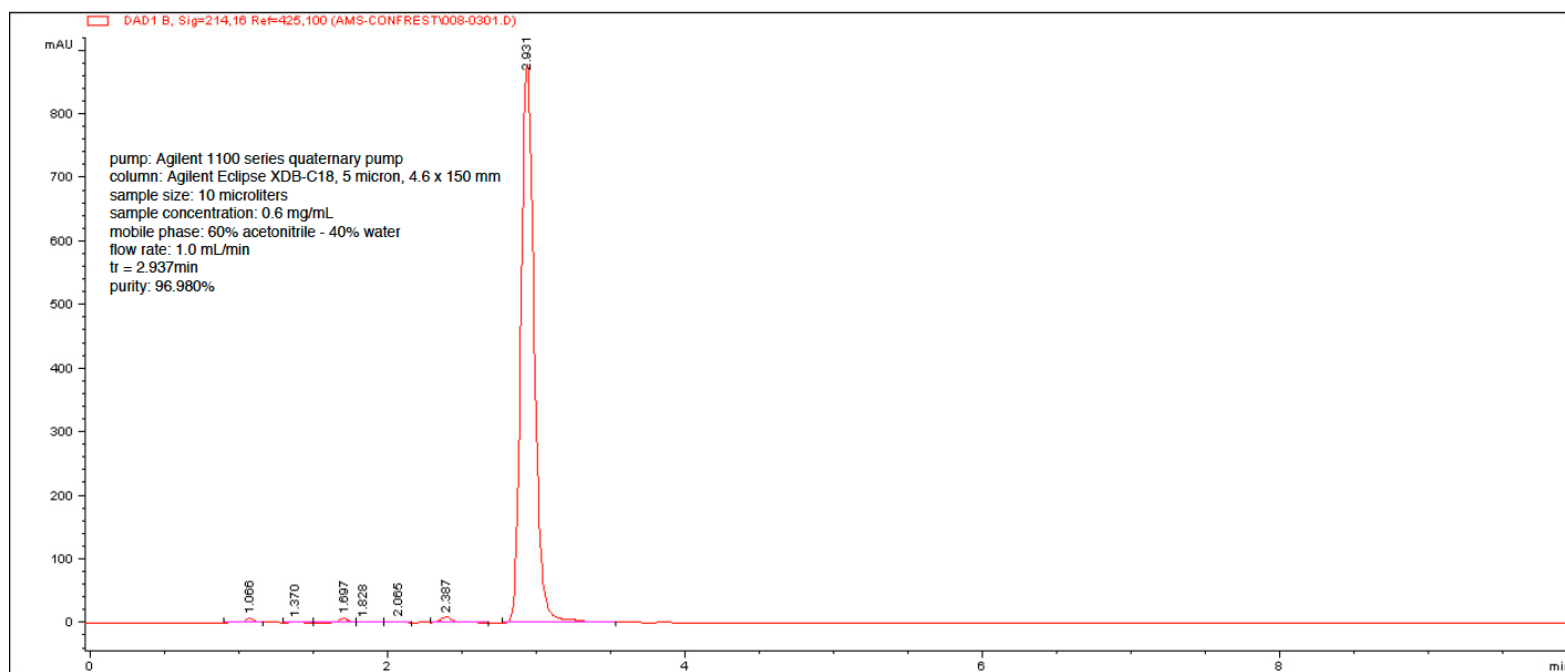



# Chromatogram and purity assessment for compound **23**

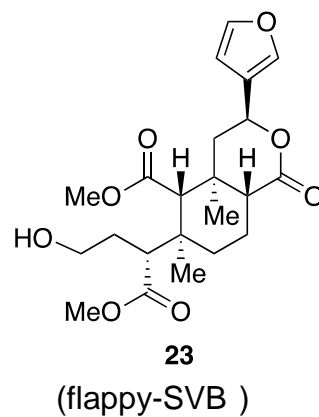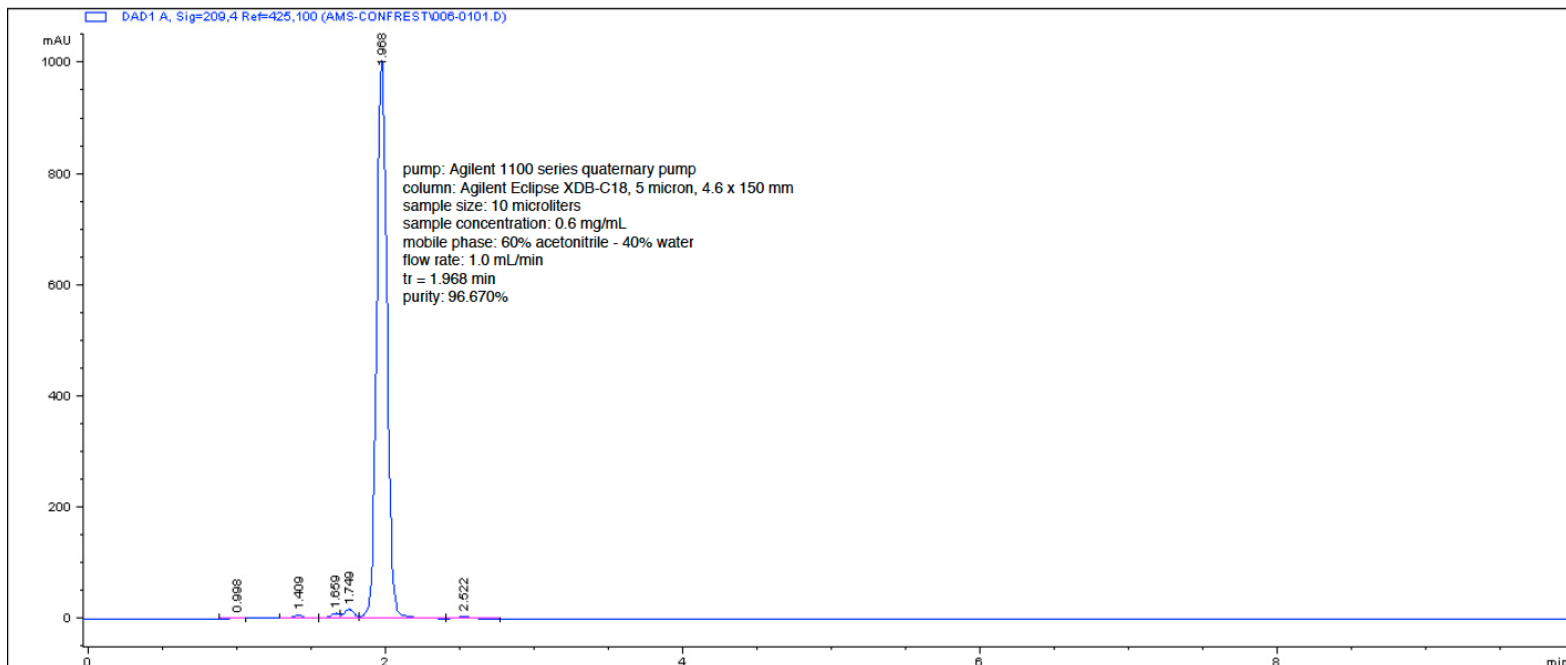

## Chromatogram and purity assessment for compound **24**

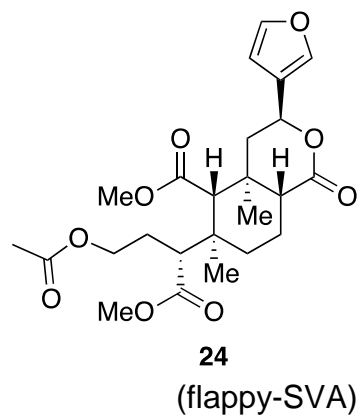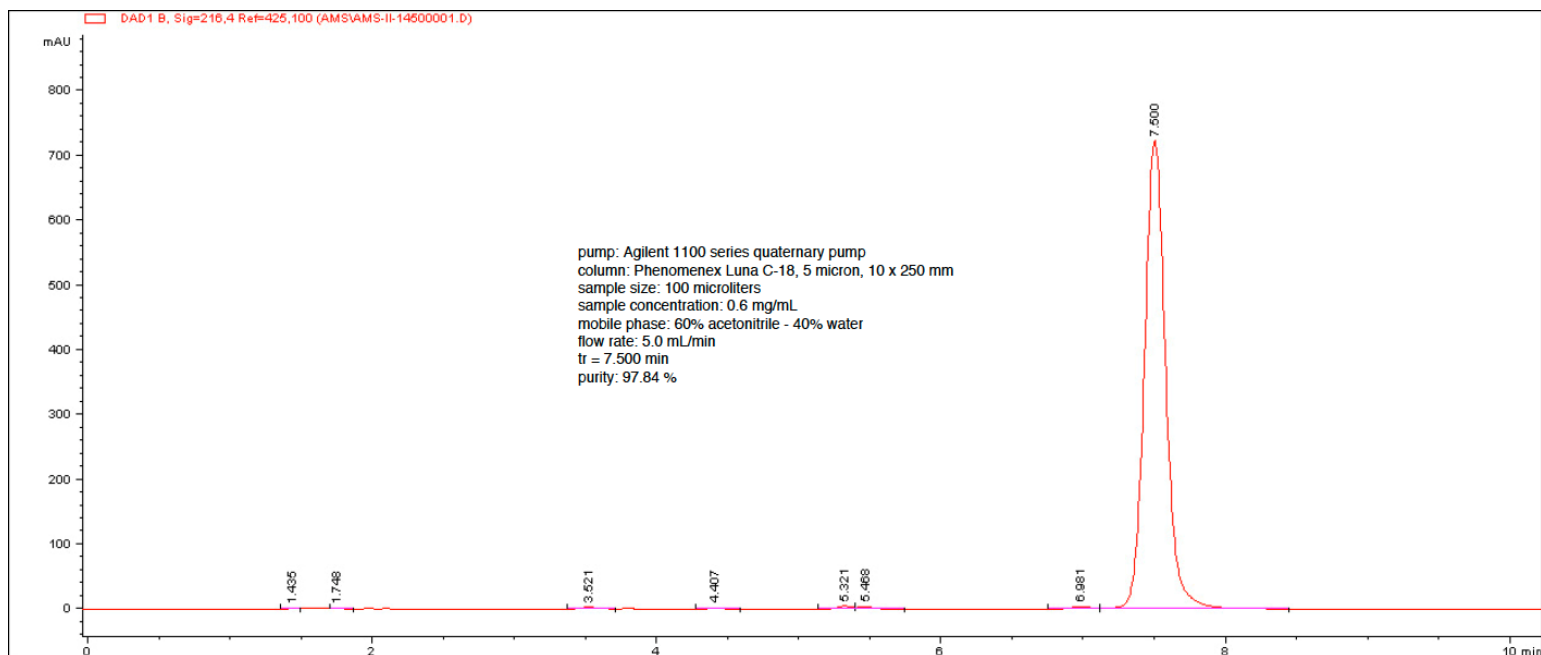

## Chromatogram and purity assessment for compound **25**

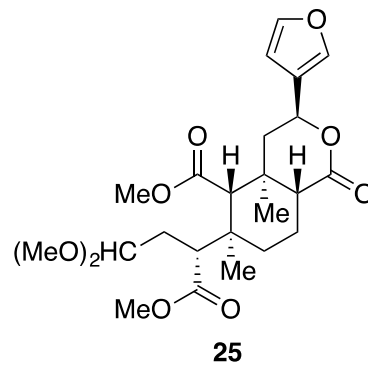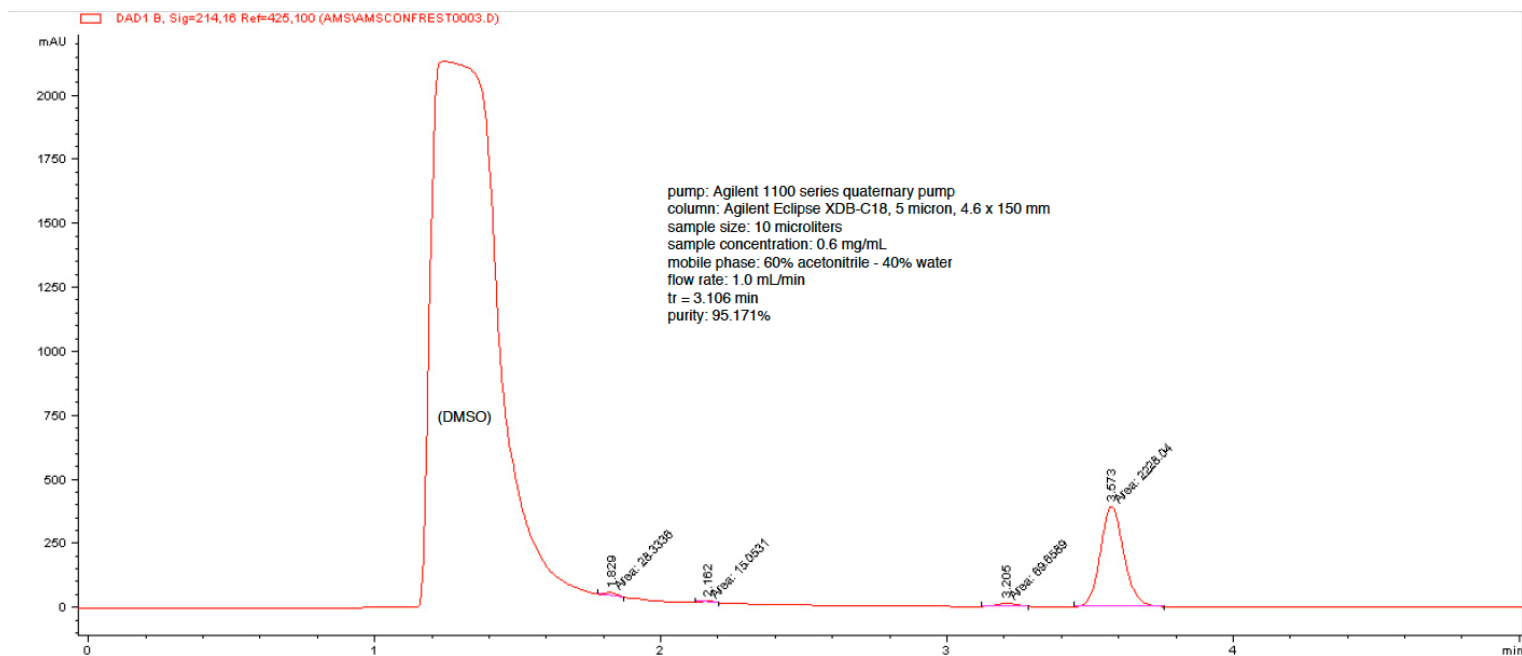

## Chromatogram and purity assessment for compound **14**

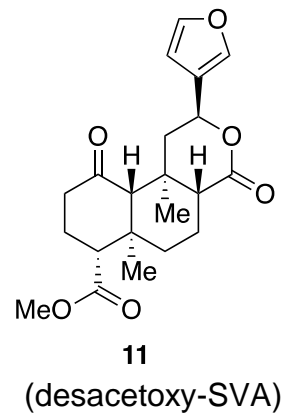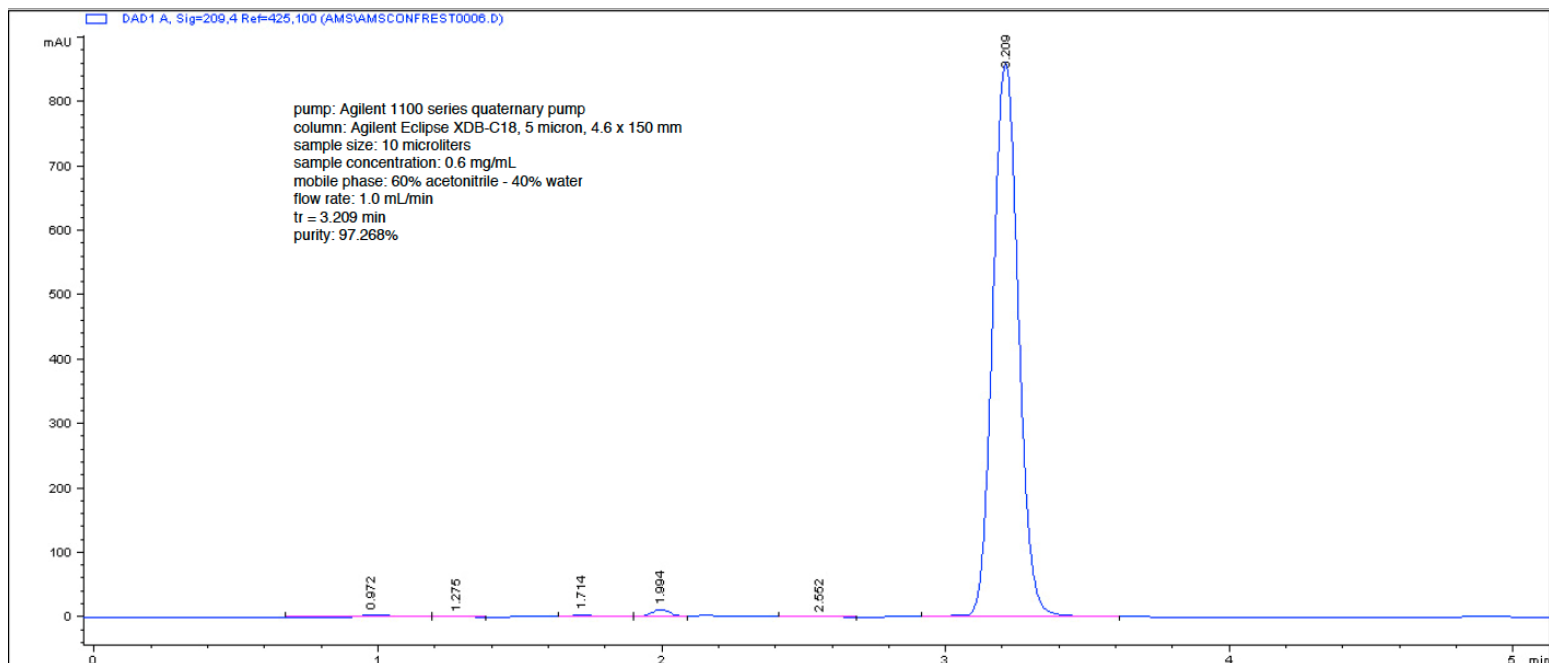

Supplement: Supplementary file 1 [file 8213840]
